# Supplementary material for: Stargardt-like Clinical Characteristics and Disease Course Associated with Variants in the WDR19 Gene
Source: MDPI journal article supplement (doi:10.3390/genes14020291), 2023-01-22
Supplement: s1 [file s1]

**Table S1.** Reported pathogenic and likely pathogenic variants in the *WDR19* gene, including variants found in our patient, and associated phenotypes. As a RefSeq NM\_025132.4 canonical transcript was used in GRCh37 (hg19) assembly.

| Exon/<br>Intron | DNA change                           | Protein            | Clinical classification                      | ClinVar ID | rsID (dbSNP) | Reference                                              | Reported/ ClinVar phenotype                                                                             | Domain |
|-----------------|--------------------------------------|--------------------|----------------------------------------------|------------|--------------|--------------------------------------------------------|---------------------------------------------------------------------------------------------------------|--------|
| 29              | c.(3183+1_3184-1)_(3261+1_3262-1)del | p.(?)              | variant of unknown significance              | N/A        | N/A          | Our patient                                            | Stargardt-like disease                                                                                  |        |
| 14              | c.1454G>T                            | p.(Ser485Ile)      | variant of unknown significance              | N/A        | N/A          | PMID: 28559085, Our patient                            | Stargardt-like disease (1x),                                                                            |        |
| 11              | c.1031A>G                            | p.(His344Arg)      | likely pathogenic                            | N/A        | rs376527958  | PMID: 28559085                                         | Stargardt-like disease (1x)                                                                             | WD 6   |
| 14              | c.1434C>G                            | p.(Ile478Met)      | pathogenic/ likely pathogenic                | 266105     | rs886039814  | PMID: 27894351                                         | Senior-Loken (2x) Cranioectodermal dysplasia (1x)                                                       |        |
| 32i             | c.3565+1G>A                          | p.?                | pathogenic                                   | 127159     | rs587777352  | PMID: 22019273, 23559409, 26489029, 29068549, 23683095 | Nephronophthisis (1x), Senior-Loken (2x), Asphyxiating thoracic dystrophy (2x)                          |        |
| 6               | c.475G>A                             | p.(Asp159Asn)      | pathogenic                                   | 446637     | rs1451698951 | PMID: 29068549                                         | Short-rib polydactyly syndrome (2x)                                                                     | WD 4   |
| 9               | c.746T>C                             | p.(Phe249Ser)      | likely pathogenic                            | 446640     | rs1553905326 | PMID: 29068549                                         | Asphyxiating thoracic dystrophy (2x)                                                                    |        |
| 9               | c.781dup                             | p.(Thr261Asnfs*13) | pathogenic                                   | 446634     | rs748656635  | PMID: 29068549, 23559409, 23683095                     | Nephronophthisis / Senior-Loken (1x), WDR19-related disorder (1x), Asphyxiating thoracic dystrophy (3x) |        |
| 9               | c.817A>G                             | p.(Asn273Asp)      | pathogenic / variant of unknown significance | 446633     | rs375644378  | PMID: 29068549                                         | Asphyxiating thoracic dystrophy (3x)                                                                    | WD 5   |
| 9               | c.880G>A                             | p.(Gly294Arg)      | likely pathogenic                            | 446635     | rs377160857  | PMID: 29068549                                         | Asphyxiating thoracic dystrophy (3x)                                                                    | WD 5   |
| 23              | c.2563C>T                            | p.(Gln855*)        | pathogenic/ likely pathogenic                | 446642     | rs772599282  | PMID: 29068549                                         | Asphyxiating thoracic dystrophy (2x)                                                                    | TPR3   |

|     |             |                   |                                                          |         |              |                                                                        |                                                                                                                                                                 |      |
|-----|-------------|-------------------|----------------------------------------------------------|---------|--------------|------------------------------------------------------------------------|-----------------------------------------------------------------------------------------------------------------------------------------------------------------|------|
| 23  | c.2585T>C   | p.(Leu862Pro)     | likely pathogenic/<br>variant of unknown<br>significance | N/A     | rs1414268971 | PMID: 29620725                                                         | Ciliopathies with major skeletal<br>involvement                                                                                                                 | TPR3 |
| 28i | c.3184-2A>C | p.?               | pathogenic                                               | 1473602 | rs1020915921 | PMID: 23683095, 29068549,<br>23559409, 22019273,                       | Senior-Loken syndrome 8/<br>Asphyxiating thoracic dystrophy                                                                                                     |      |
| 31i | c.3484-2A>C | p.?               | pathogenic                                               | 446636  | rs1553918403 | PMID: 29068549                                                         | Asphyxiating thoracic dystrophy (1x),<br>Short-rib polydactyly syndrome (2x)                                                                                    |      |
| 33i | c.3716+1G>A | p.?               | pathogenic                                               | 446639  | rs1191056931 | PMID: 29068549                                                         | Asphyxiating thoracic dystrophy (2x)                                                                                                                            |      |
| 34  | c.3800G>A   | p.(Cys1267Tyr)    | pathogenic                                               | 446638  | rs745603321  | PMID: 29068549                                                         | Asphyxiating thoracic dystrophy (2x)                                                                                                                            |      |
| 1i  | c.6+1G>T    | p.?               | pathogenic                                               | N/A     | N/A          | PMID: 33323469                                                         | Nephronophtsis related ciliopathy                                                                                                                               |      |
| 2   | c.31_35del  | p.(Thr11Alafs*23) | pathogenic                                               | N/A     | N/A          | VKGL data sharing initiative<br>Nederland                              | N/A                                                                                                                                                             | WD 1 |
| 5i  | c.407-2A>G  | p.?               | pathogenic                                               | 189380  | rs374400438  | PMID: 23683095                                                         | Senior-Loken syndrome 8/ retinitis<br>pigmentosa                                                                                                                |      |
| 8   | c.641dup    | p.(Leu214Phefs*5) | pathogenic                                               | 127154  | rs587777348  | PMID: 23683095, 23559409                                               | Senior-Loken syndrome 8 (2x)                                                                                                                                    |      |
| 8   | c.641T>A    | p.(Leu214Ter)     | pathogenic/ likely<br>pathogenic                         | 632439  | rs751290509  | PMID: 22019273, 23559409,<br>23683095, 26275793, 27241786,<br>29068549 | Cranioectodermal dysplasia (1x),<br>Senior-Loken syndrome /<br>Asphyxiating thoracic dystrophy (1x),<br>Retinal dystrophy (1x), WDR19-related<br>disorders (1x) |      |
| 8   | c.682C>T    | p.(Gln228*)       | pathogenic                                               | 127156  | rs587777350  | PMID: 23559409                                                         | Nephronophtsis related ciliopathy                                                                                                                               |      |
| 14  | c.1477G>C   | p.(Asp493His)     | pathogenic                                               | 127155  | rs587777349  | PMID: 23683095                                                         | Senior-Loken syndrome /<br>Asphyxiating thoracic dystrophy (1x),<br>Senior-Loken (1x), Nephronophtsis<br>(1x)                                                   |      |
| 17i | c.1983-2A>T | p.?               | likely pathogenic                                        | N/A     | N/A          | PMID: 31725169                                                         | Retinitis pigmentosa (1x)                                                                                                                                       |      |

|       |            |                |                                                                |         |              |                                                    |                                                                                                                                                                                             |      |
|-------|------------|----------------|----------------------------------------------------------------|---------|--------------|----------------------------------------------------|---------------------------------------------------------------------------------------------------------------------------------------------------------------------------------------------|------|
| 25    | c.2782A>T  | p.(Ile928Phe)  | pathogenic / variant of unknown significance                   | 348744  | rs780963454  | PMID: 31725169                                     | Asphyxiating thoracic dystrophy (2x), Cranioectodermal dysplasia (1x), Retinitis pigmentosa (1x)                                                                                            | TPR4 |
| 33    | c.3703G>A  | p.(Glu1235Lys) | pathogenic                                                     | 127157  | rs587777351  | PMID: 33532864, 23559409, 31101064                 | Senior-Loken syndrome/ Asphyxiating thoracic dystrophy (1x), Senior-Loken syndrome (1x), Nephronophthisis (2x),                                                                             |      |
| 18    | c.2129T>C  | p.(Leu710Ser)  | likely pathogenic, variant of unknown significance             | 30703   | rs387906980  | PMID: 23683095, 22019273, 27241786, PMID: 28559086 | Senior-Loken syndrome (2x), Senior-Loken syndrome/ Asphyxiating thoracic dystrophy (1x), Cranioectodermal dysplasia (1x), Syndromic early childhood onset retinal dystrophy (1x), arRP (1x) |      |
| 10-13 | ex10-13del | p.?            | likely pathogenic                                              | N/A     | N/A          | PMID:31101064                                      | Nephronophthisis (1x)                                                                                                                                                                       |      |
| 25    | c.2777G>T  | p.(Ser926Ile)  | likely pathogenic, pathogenic                                  | 191190  | rs751386429  | PMID: 29620724, 32055034                           | Cranioectodermal dysplasia (1x), Stargardt-like disease (3x)                                                                                                                                | TPR4 |
| 32    | c.3533G>A  | p.(Arg1178Gln) | likely pathogenic/ pathogenic, variant of unknown significance | 127158  | rs79436363   | PMID: 23559409                                     | Nephronophthisis (1x), Senior-Loken syndrome (2x), Leber congenital amaurosis (1x), Cranioectodermal dysplasia (1x), Senior-Loken syndrome/ Asphyxiating thoracic dystrophy (1x)            |      |
| 15    | c.1483G>C  | p.(Gly495Arg)  | pathogenic/ likely pathogenic                                  | 446641  | rs1215108056 | PMID: 29068549                                     | Asphyxiating thoracic dystrophy (3x)                                                                                                                                                        |      |
| 9     | c.812C>T   | p.(Ala271Val)  | likely pathogenic, Variant of unknown significance             | 1514580 | rs981943939  | N/A                                                | Asphyxiating thoracic dystrophy (1x)                                                                                                                                                        |      |
| 22    | c.2561A>C  | p.(Lys854Thr)  | likely pathogenic                                              | N/A     | N/A          | PMID: 29068549                                     | Asphyxiating thoracic dystrophy (1x)                                                                                                                                                        | TPR3 |
| 2     | c.20T>C    | p.(Leu7Pro)    | likely pathogenic                                              | 30705   | rs387906982  | PMID: 22019273                                     | Short-rib thoracic dysplasia without polydactyly syndrome (1x)                                                                                                                              |      |

|       |                                                     |                     |                                    |         |             |                          |                                                                                                    |             |
|-------|-----------------------------------------------------|---------------------|------------------------------------|---------|-------------|--------------------------|----------------------------------------------------------------------------------------------------|-------------|
| 2     | c.89_90insTAC<br>T                                  | p.(Val31Thrfs*6)    | likely pathogenic                  | N/A     | N/A         | PMID: 32037395           | Retinal dystrophy                                                                                  | WD 1        |
| 11    | c.1034T>G                                           | p.(Val345Gly)       | likely pathogenic                  | 30706   | rs387906983 | PMID: 22019273           | Nephronophtisis (1x)                                                                               | WD 6        |
| 23i   | c.2645+1G>T                                         | p.(?)               | likely pathogenic                  | 1686924 | N/A         | PMID: 33946315, 28621010 | Cranioectodermal dysplasia (1x)                                                                    |             |
| 25    | c.2777G>T                                           | p.(Ser926Ile)       | likely pathogenic                  | 191190  | rs751386429 | PMID: 26355662           | arRP (1x)                                                                                          | TPR4        |
| 27    | c.3068dup                                           | p.(Tyr1023*)        | likely pathogenic                  | 30707   | rs786205114 | PMID: 22019273           | Nephronophtisis (1x)                                                                               | TPR6        |
| 27    | c.3066_3067del                                      | p.(Tyr1023Serfs*18) | likely pathogenic                  | N/A     | N/A         | PMID: 28559085           | Syndromic early childhood onset<br>retinal dystrophy (1x)                                          | TPR6        |
| 30    | c.3307C>T                                           | p.(Arg1103*)        | likely pathogenic                  | 30704   | rs387906981 | PMID: 22019273, 24027799 | Senior-Loken syndrome/ Asphyxiating<br>thoracic dystrophy (1x),<br>Cranioectodermal dysplasia (2x) |             |
| 10-14 | NC_000004.11:g<br>.(?_39215680)_(<br>39219295_?)del | p.(?)rRP (1x)       | pathogenic                         | 625691  | N/A         | N/A                      | Nephronophtisis (1x)                                                                               | WD5-<br>WD6 |
| 22-28 | NC_000004.11:g<br>.(?_39245868)_(<br>39259174_?)del | p.(?)               | variant of unknown<br>significance | 1042683 | N/A         | N/A                      | Senior-Loken syndrome/ Asphyxiating<br>thoracic dystrophy (1x)                                     |             |
| 27    | NC_000004.11:g<br>.(?_39257448)_(<br>39257600_?)del | p.(?)               | pathogenic                         | 1457671 | N/A         | N/A                      | Senior-Loken syndrome/ Asphyxiating<br>thoracic dystrophy (1x)                                     |             |

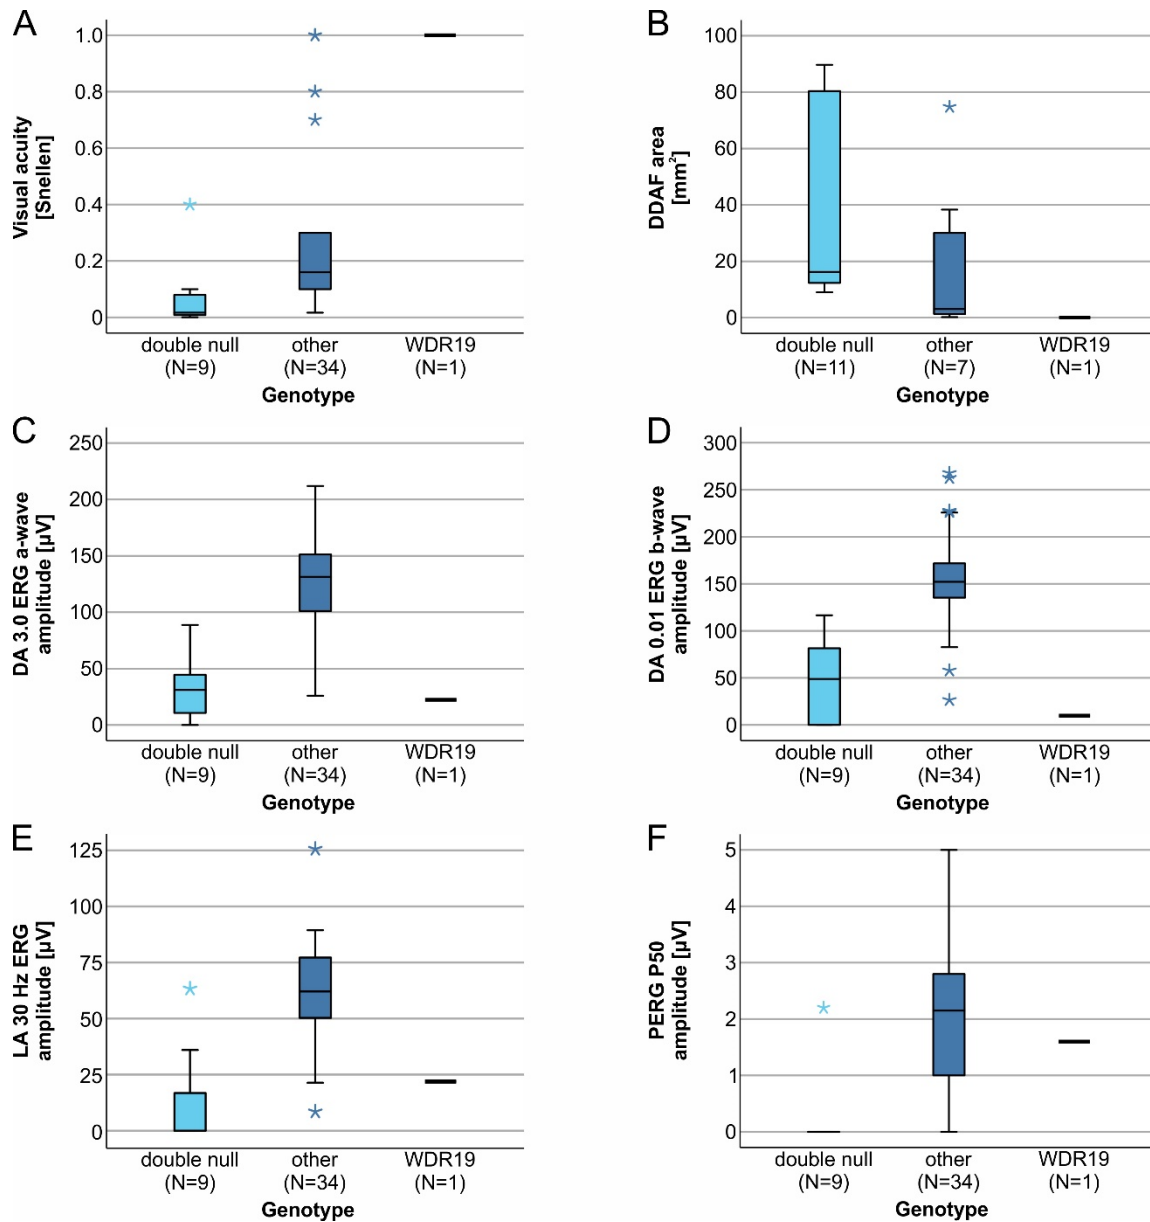

**Figure S1.** Boxplot charts showing measured parameters in patients with different genotypes. Horizontal lines represent median values, boxes half of the data and whiskers the remaining data except in the case of the outliers (stars). VA—visual acuity, DDAF—definitely decreased autofluorescence, ERG—electroretinography, dark-adapted, DA—dark-adapted, LA—light-adapted, PERG—pattern ERG.
